1 **Zika virus replicates in skeletal muscle contributing to peripheral viral**  
2 **amplification prior to reach neural tissue.**

3 Daniel Gavino-Leopoldino<sup>1</sup>, Camila Menezes Figueiredo<sup>1</sup>, Letícia Gonçalves  
4 Barcellos<sup>1</sup>, Mariana Oliveira Lopes da Silva<sup>1</sup>, Suzana Maria Bernardino Araújo<sup>2</sup>,  
5 Rômulo Leão da Silva Neris<sup>1</sup>, Laryssa Daniele Miranda<sup>1</sup>, Leandro Ladislau<sup>3</sup>, Claudia  
6 Farias Benjamim<sup>4</sup>, Andrea Thompson Da Poain<sup>5</sup>, Julia Rosauo Clarke<sup>2</sup>, Claudia Pinto  
7 Figueiredo<sup>2</sup> and Iranai Assunção-Miranda<sup>1\*</sup>

8

9 1. Instituto de Microbiologia Paulo de Goes, Universidade Federal do Rio de  
10 Janeiro, Rio de Janeiro, Brazil;

11 2. Faculdade de Farmácia, Universidade Federal do Rio de Janeiro, Rio de Janeiro,  
12 Brazil;

13 3. Instituto de Ciências Biomédicas, Universidade Federal do Rio de Janeiro, Rio  
14 de Janeiro, Brazil;

15 4. Instituto de Biofísica Carlos Chagas Filho, Universidade Federal do Rio de  
16 Janeiro.

17 5. Instituto de Bioquímica Médica Leopoldo de Meis, Universidade Federal do Rio  
18 de Janeiro, Rio de Janeiro, Brazil.

19

20 \*Corresponding author

21 E-mail: iranaiamiranda@micro.ufrj.br

22

23

24

25

26 **Abstract**

27 Zika virus (ZIKV) infections are still a worldwide concern due to the severity of  
28 neurological outcomes. ZIKV neurotropism is well characterized, but peripheral tissue  
29 could be sites of viral amplification, contributing to endothelial-barrier crossing and  
30 access to peripheral nerves. During acute and late phases of infection, ZIKV can be  
31 detected in several body fluids, eyes, testis and vagina. However, the importance of  
32 initial replication sites for the establishment of infection and viral spread remain  
33 unknown. Here we demonstrated that ZIKV replicates primarily in human muscle  
34 precursor cells, resulting in cell death and inhibition of myogenesis. ZIKV also  
35 replicates in fetal muscle after maternal transmission and in infected neonate mice,  
36 inducing lesions and inflammation. Muscle was an important site of viral amplification,  
37 sustaining higher peripheral viral loads than liver and spleen. In addition, ZIKV showed  
38 rapid and sustained replication kinetics in muscle even before replication in the neural  
39 tissues, persisting until 16 days post infection. Our results highlight the importance of  
40 muscle in ZIKV pathogenesis as a peripheral site of viral amplification which may  
41 contribute to ZIKV reaching neural structures.

42 **Keywords:** Zika virus replication; skeletal muscle cells; muscle inflammation; viral  
43 dissemination; pathogenesis.

44

45

46

47

48

49

## 50 **Author Summary**

51 Zika Virus (ZIKV) neurotropism and its deleterious effects on central nervous system  
52 have been well characterized. But, investigations of the initial replication sites for the  
53 establishment of infection and viral spread to neural tissues remain under explored.  
54 Here we demonstrated that ZIKV replicates primarily in human skeletal muscle  
55 precursor cells, resulting in cell death and disrupted myogenesis. ZIKV also replicates  
56 in muscle of fetus and neonate mice inducing muscle damage and inflammation. Muscle  
57 replication occurs before amplification in peripheral nerves and brain, contributing to  
58 the increase of peripheral ZIKV load and dissemination. In addition, ZIKV RNA still  
59 been detected in skeletal muscle at late stages of infection. Overall, our findings showed  
60 that skeletal muscle is involved in ZIKV pathogenesis, contributing to a broader  
61 understanding of ZIKV infection. Thus, opens new aspects in the investigation of the  
62 long-term consequence of early infection.

63

## 64 **Introduction**

65 Zika virus (ZIKV) is an arbovirus from the *Flaviviridae* family transmitted  
66 mainly by *Aedes* mosquitoes. ZIKV disseminated rapidly across the Americas in the last  
67 years (1) and although historically this infection caused a self-limited mild febrile  
68 condition similar to that induced by other arboviruses, reports of persistent and severe  
69 neurological damage started to appear. It is now known that vertical transmission of  
70 ZIKV can cause fetal death and congenital defects, such as microcephaly (2) while  
71 neuroinflammatory conditions such as Guillain-Barré Syndrome (GBS) and encephalitis  
72 have been reported in adult patients (3-6).

73           Several studies have described the molecular mechanisms of the pathogenesis  
74 of ZIKV infection, mainly neuroinvasion and the damage on the central nervous system  
75 (CNS). It has been demonstrated that ZIKV replicates in human neural progenitor cells  
76 and brain organoids, resulting in cell death and cell cycle arrest (7, 8). Both intra-uterine  
77 and neonatal ZIKV exposure in mice was shown to compromise neurogenesis and cause  
78 severe necrosis in different brain regions, along with persistent viral replication and  
79 widespread neuroinflammation (9, 10). Moreover, it was shown that activation of  
80 microglial cells and astrocytes associated to viral replication in the brain affects  
81 cognitive function and the differentiation of glial progenitors cells impairing brain  
82 development (11, 12).

83           Under physiological conditions, the blood brain barrier (BBB) protects the  
84 brain from the effects of peripheral infections. However, in some circumstances the  
85 integrity of this endothelial barrier can be broken allowing pathogenic agents to reach  
86 the brain. It has been hypothesized that viral replication in peripheral tissues could  
87 contribute to amplification of viral loads early during ZIKV infection and before the  
88 virus invades the CNS (13). ZIKV has been shown to replicate and cross the endothelial  
89 barrier without significantly affect its permeability (14, 15). Additionally, it was  
90 demonstrated that ZIKV replicates in human peripheral neurons *in vitro* (16). Thus,  
91 replication in motors and sensory tissues, in addition to contributes to viral load, could  
92 be a route used by ZIKV to access the peripheral nerves and reaches by retrograde  
93 axonal-transport some immuno privileged sites such as the brain (17). This is a  
94 mechanism known to be involved in infections by other neurotropic viruses including  
95 the member of Flaviviridae family, West Nile virus (18-20). Despite the evidence that  
96 ZIKV can be detected both during acute and late phases of infection in several

97 body fluids, eyes, testis and vagina (21). The importance of initial replication sites for  
98 the establishment of infection and viral spread remain unknown.

99 Here we investigated the ability of ZIKV to establish a productive replication  
100 in the skeletal muscle. We found that ZIKV replicates in human muscle precursor cells,  
101 impairing differentiation and causing cell death. Using mouse models, we showed that  
102 ZIKV induce necrotic lesions and inflammation in the muscle of fetuses and newborns  
103 by establishing rapid and sustained replication kinetics. Interestingly, ZIKV replication  
104 in the muscle temporally precedes the detection of viral RNA in the brain. Taken  
105 together, our results indicate that the skeletal muscle is an early site of viral  
106 amplification that may contribute to ZIKV reaches neural tissues.

107

## 108 **Results**

### 109 *ZIKV replicates in human skeletal muscle progenitor cells, causing cell death*

110 The main extra-neuronal sites of ZIKV replication and the role of peripheral viral  
111 replication in the establishment of infection are still poorly understood. In order to  
112 evaluate whether muscle is a potential site of ZIKV replication, we infected primary  
113 human skeletal muscle myoblast cells (HSMM), both in an undifferentiated stage  
114 (myoblast culture) and after cell fusion and differentiation into muscle fibers  
115 (myotubes). Temporal quantification of infectious particles in culture media (**Fig 1A**)  
116 revealed a rapid increase in ZIKV infectious particles in myoblast cultures, which lasted  
117 for at least 48 hours post-infection (hpi). No increase in viral particles from myotubes in  
118 culture was observed until 16 hpi, but titers were comparable to those seen in myoblasts  
119 at 36 hpi. In agreement with the replication curves, we positive immunostaining against  
120 ZIKV E protein (**Figs 1B and 1C**) and ZIKV non-structural 2B protein (NS2B) (**Figs**  
121 **1D and 1E**) in both myoblasts and myotubes in culture, when analyzed 36 hpi. No

122 staining for either viral protein was observed in mock myoblast (**S1A Fig**) and  
123 myotubes (**S1B Fig**) cultures. Quantification of 4G2-positive cells showed a  
124 significantly higher number of ZIKV-positive cells in myoblast cultures when compared  
125 to myotube cultures at 36 and 48 hpi (**Fig 1H**).

126       Next, we evaluated whether ZIKV replication affects the viability of skeletal  
127 muscle cells. When analyzed 48 hpi, we observed that while infection promoted reduced  
128 myoblast viability to ~50%, viability of myotubes in cultures exposed to ZIKV was not  
129 affected (**Fig 1I**). Furthermore, consistent with these observations, myosin heavy chain  
130 (MF20) immunolabeling in mock- and ZIKV-treated myotube cultures showed that  
131 ZIKV infection did not alter fiber structure when compared to cells treated with mock  
132 (**Figs 1F and 1G**). In addition, quantification of MF20 images showed that the infection  
133 did not altered the number of fibers nor the fiber area (**Figs 1J and 1L**), suggesting that  
134 ZIKV infection does not interfere with the integrity of the already formed myofiber  
135 structures. Taken together, these data suggested that ZIKV is capable of replicating in  
136 myogenic cells causing significant cell damage.

### 137 *ZIKV infection inhibits myogenesis*

138 Considering our results showing that ZIKV replicates and causes death of muscle  
139 progenitor cells, we investigated whether ZIKV interferes with myogenesis by altering  
140 the number and integrity of the newly formed fibers. To this end, we subjected human  
141 myoblast cultures to fusion and differentiation-inducing medium and infected these  
142 cells at an early stage of differentiation (1-day post-differentiation stimuli). Fiber  
143 formation was evaluated by MF20 immunolabeling after infection (day 1) and at 5-day  
144 post-differentiation stimuli, that cultures reached late stage of differentiation (day 5),  
145 and showed a reduction of MF20 positive cells in ZIKV infected culture at day 5

146 comparing to Mock (**Fig 2A**). Quantitative analysis indicated that ZIKV infection  
147 promoted a decrease in the average fiber-area and in the amount of differentiated fibers,  
148 5 days after differentiation induction (**Figs 2B and 2C**). We also observed a rapid  
149 increase in infectious viral particles in culture medium of ZIKV-infected myoblasts  
150 under differentiation, and ZIKV replication was maintained for at least 96 hpi (**Fig 2D**).  
151 We also observed a reduction in MTT metabolization when compared to mock-treated  
152 cultures (**Fig 2E**). These data showed that myoblast differentiation and fiber-occupied  
153 area were impacted by viral exposure, suggesting that myogenesis is directly affected by  
154 ZIKV infection.

### 155 *ZIKV replicates and promotes damage in the skeletal muscle in vivo*

156 Since myoblast fusion is critical not only for the correct development of skeletal  
157 muscle but also for the adequate function of the developed tissue (22), we investigated  
158 the ability of ZIKV to replicate and induce muscle tissue damage during early stages of  
159 development *in vivo*. To this end, we first used a mouse model of ZIKV maternal  
160 transmission using type-I interferon receptor deficient (IFNAR<sup>-/-</sup>) pregnant mice in  
161 different gestational stages (**Fig 3A**). ZIKV subcutaneous infection at 10.5 days of  
162 pregnancy resulted in 100% fetal loss (data not show), whereas a significant reduction  
163 in the number of pups born from each dam was observed when infection was conducted  
164 at 12.5 days of gestation (**Fig 3B and S2A Fig**). Fetal death following ZIKV infection  
165 was further confirmed by the presence of fetal resorption fragments found in the  
166 placenta of infected mice (**S2B Fig**). We also observed difference in the pups, which  
167 showed low motility and cases of stillbirths after maternal infection in 12.5 days of  
168 gestation (**S2A Fig**). The number pups per offspring was not affected when infection  
169 was performed at either 14.5 or 18.5 days of gestation. ZIKV RNA was quantified in

170 pups' skeletal muscle from left and right hind legs collected bilaterally at post-natal day  
171 0. Although muscular viral titers at birth were higher when infection was performed at  
172 earlier stages of pregnancy, viral RNA was detected after infection at all gestational  
173 tested (**Fig 3C**). ZIKV RNA was also detected in brains of newborn pups (**Fig 3D**), and  
174 viral load was comparable between brain and muscle. Fetal fragments collected from  
175 placenta of dams infected at 12.5 days of gestation, however, showed higher viral loads  
176 than both brains and muscles of pups analyzed on the day of birth (**Fig S2B**). These data  
177 indicate that muscle is a site of ZIKV replication during embryogenesis, sustaining  
178 detectable viral loads until the birth of pups.

179 We also investigated ZIKV replication in 3 days-old wild-type (WT) neonatal  
180 mice, infected subcutaneously with ZIKV. We observed that ZIKV-infected mice  
181 presented a significant reduction in body weight gain when compared to the mock group  
182 (**Fig 3E**) and a high mortality rate starting 12 days after ZIKV inoculation (**S2C Fig**).  
183 The quantification of ZIKV RNA in the skeletal muscle from hind leg of mice collected  
184 bilaterally showed a rapid increase in the viral titers after inoculation (**Fig 3F**), with the  
185 replication peak occurring at 2 days post-infection (dpi), and plateauing at least until 6  
186 dpi. We also observed an increase of ZIKV titers in spleen at 1 dpi, but in this case the  
187 titers decreased to a very low level in the subsequent days (**Fig 3F**). In addition, we did  
188 not observe a temporal increase in ZIKV titers in the liver, which showed undetectable  
189 values after 4 dpi (**Fig 3F**). These observations indicate that, compared to the rodent  
190 spleen and liver, the muscle is an important site of ZIKV amplification amongst  
191 peripheral tissues in mice, being able to sustain high viral loads for longer periods.

192 We next investigated whether ZIKV replication in muscle triggers tissue injury  
193 and inflammation. Histological analysis demonstrated that ZIKV infection is



194 accompanied by an inflammatory infiltrate in the muscle of newborn pups (P0) after  
195 maternal transmission and of neonatal mice 6 dpi (**Figs 4A-4F**). In addition, we  
196 observed necrotic areas and alterations on fiber structure. We also found indications of  
197 muscle atrophy (**Figs 4B and 4C**). In agreement with the observed morphological  
198 alterations, we found increased levels of mRNA of several pro-inflammatory mediators,  
199 including TNF, IL-1 $\beta$ , IL-6 and RANTES, in the skeletal muscle of ZIKV-infected mice  
200 compared to mock-injected mice at 6 dpi (**Figs 4G-4J**). No change in mRNA levels of  
201 the chemokine MCP-1 (**Fig 4L**) and of the anti-inflammatory cytokines, TGF- $\beta$  and IL-  
202 10 were seen following ZIKV infection compared to mock animals (**S3A and S3B**  
203 **Figs**). To investigate whether ZIKV-induced inflammation of muscle tissue leads to an  
204 active process of atrophy, we evaluated the expression of Muscle RING Finger 1  
205 (MuRF1) and Atrogin-1, both ubiquitin ligases which are associated to degradation of  
206 muscle proteins (23). We found an increased expression of both signaling proteins in  
207 the muscle of ZIKV-infected mice compared to the control (**Figs 4M and 4N**). These  
208 data support that ZIKV replication in muscle tissue promotes inflammation-induced  
209 muscular damage.

#### 210 *ZIKV replicates in muscle prior to reach neural tissue in mice*

211 To investigate the dynamics of ZIKV infection in mice tissues, we compared the time  
212 course of virus replication in neural and muscle tissues (**Fig 5A**). Viral amplification in  
213 muscle started immediately after virus inoculation (10-fold increase in viral titer is  
214 observed at 1 dpi), while an increase in ZIKV RNA levels in dorsal root ganglia (DRG),  
215 spinal cord (SC) and brain was detected only at day 4 of infection (ZIKV RNA levels  
216 were the same as the viral input until 2 dpi in these tissues, as indicated by dotted line in  
217 **Fig 5A**. The absence of virus replication in brain tissue at the early times after infection

218 is consistent with the preservation of blood brain barrier (BBB) integrity in 3 days-old  
219 mice at the moment of ZIKV inoculation (**S3C Fig**), as well as after 2 days of infection  
220 (**S3D Fig**). However, ZIKV amplification in the brain became evident at 4 days post-  
221 infection, but BBB integrity was not drastically disrupted at this time point (**S3E Fig**).  
222 Despite the rapid amplification rates of ZIKV in muscle, the viral load in brain and SC  
223 reached levels higher than in muscle after 6 dpi, which was consistent with the known  
224 neurotropism of ZIKV.

225         Replication in DRG is detectable only after 6 days of infection. To confirm that  
226 the increase in ZIKV RNA in this tissue corresponds to an active viral replication, we  
227 searched for the negative strand of viral RNA (**Fig 5B**). Consistently with the data of  
228 pfu equivalent, lower levels of ZIKV RNA negative strand were detected in DRG  
229 compared to SC and brain. Interestingly, ZIKV could still be detected in muscle and  
230 brain tissue until 16 dpi at the same levels of 6 dpi in the last long-surviving mice (**Fig**  
231 **5C**). The ZIKV titer was maintained with 2 logs of difference between these tissues.  
232 These data indicate that ZIKV establishes a rapid and sustained infection in the muscle  
233 tissue, which would contribute to viral amplification and dissemination to neural  
234 structures, the main target of replication.

## 235 **Discussion**

236         ZIKV neurotropism has been extensively characterized due to its potential to  
237 induce microcephaly and other birth defects after gestational infection (24, 25).  
238 However, the contribution of ZIKV replication in peripheral tissues to pathogenesis is  
239 still unexplored. Thus, further investigations concerning the complete range of ZIKV  
240 induced lesions, as well as the determinants factors of pathogenesis severity are  
241 mandatory to prevent brain damage induced by the infection.

242 Muscular pain is a recurrent symptom associated with ZIKV infection, affecting  
243 up to 65% of patients in some outbreaks (26, 27). Skeletal muscle is a widespread body  
244 tissue comprised by mature fibers and myogenic precursor cells that are responsible for  
245 muscle development and repair (28). Muscle cells have been described as a target for  
246 replication of some arboviruses, such as Dengue (DENV) and Chikungunya (CHIKV),  
247 playing a significant role in their pathogenesis (29-31). Here we demonstrated that ZIKV  
248 replicates and damage cultured human primary muscle cells, and muscle tissue of fetus  
249 after maternal transmission and of neonate infected mice. Our data indicates that muscle  
250 is a target for ZIKV replication and site of injury. The ZIKV ability to infect and induce  
251 muscle damage is consistent with the high frequency of myalgia in patients, including  
252 those cases of self-limited disease and with neurological complications (32-34). In  
253 addition, it also suggests that an initial muscular replication may be a common step  
254 before ZIKV reaches neural structure.

255 Although ZIKV tropism in peripheral tissues was not well characterized yet,  
256 clinical studies have shown the viral persistence in several body fluids (21). First's  
257 reports evaluating cell permissiveness demonstrated that ZIKV replicates at placental  
258 trophoblasts, endothelial cells, human skin fibroblast and neonatal keratinocytes (21, 35,  
259 36). ZIKV also replicates and induce morphological alterations in human skin explants  
260 (35), that are consistent with skin lesions presented in many ZIKV-infected patients  
261 (37). After mosquito inoculation, skin cells (keratinocytes and dendritic cells) are the  
262 first target of ZIKV, followed by hematological dissemination. Mosquito or  
263 subcutaneous inoculation in non-human primates showed that ZIKV present a broad  
264 range tissue distribution with highest load at lymph nodes (38). Differing from DENV  
265 infection, *in vitro* and *in vivo* studies indicates that liver, despite susceptibility of some  
266 hepatocytes lineages (39), do not sustain high loads of ZIKV amplification in animal

267 models (38). In agreement with this, we did not find ZIKV amplification in the liver  
268 during neonatal infection in mice. Our data suggest that the skeletal muscle is an  
269 important peripheral site for ZIKV amplification, mainly when compared with liver and  
270 spleen.

271 Fetal and neonatal muscle tissue is formed by fiber under maturation and muscle  
272 precursor cell, which differs according to its proliferative and fusogenic activity (40,  
273 41). Similar to brain, where ZIKV replicates in neural progenitor's cells (42, 43), we  
274 demonstrated that muscle precursor cell are the more susceptible to ZIKV than fibers,  
275 revealing that the preference for undifferentiated cell is a common feature of ZIKV  
276 tropism. In addition, ZIKV replication in neural stem cells also promotes cell death and  
277 decreases neurogenesis (44). Our findings suggest that ZIKV-induced cell death of  
278 muscle precursor cells may contribute to myogenesis disruption during fetal and  
279 neonatal muscle development. We demonstrated that ZIKV replication during muscle  
280 cells differentiation impact the number and area of the newly formed fiber. Impaired  
281 myogenesis could be related to cell death and with focal muscle atrophy observed in  
282 mice muscle at birth after fetal exposure to ZIKV. These data corroborate with clinical  
283 findings that showed atrophy of skeletal muscle in a human fetus after ZIKV maternal  
284 transmission (45). Further studies to evaluate the relationship between motor function  
285 and muscular replication of ZIKV should be addressed.

286 Muscle body composition after birth, despite present reduced myogenesis, grows  
287 very fast due to a high rate of protein synthesis (41, 42). However, a high number of  
288 precursor cells are maintained even at adult life, being responsible for muscle repair  
289 after injury (46). Thus, muscle precursor cells could be responsible by peripheral ZIKV  
290 amplification, even at adult life. In our neonate model, the load of ZIKV in muscle was

291 sustained high until 16 days post-infection, raising the possibility of being a site of viral  
292 persistence and inflammation. ZIKV infection also promoted muscle lesions, with  
293 inflammatory cell infiltration, together with high levels of TNF, IL-1 $\beta$ , IL-6 and  
294 RANTES. Interestingly, the expressions of muscle degradation proteins were also  
295 increased during ZIKV infection in neonate mice. The increase in muscle mass loss  
296 could be trigger by several pro-inflammatory cytokines and others inflammatory  
297 mediator, such as TNF and IL-1 $\beta$  (47), that was fouded elevated in muscle during ZIKV  
298 infection, and could promote a reduction in muscle hypertrophy during development. In  
299 addition, the expression of anti-inflammatory cytokines that are associated with muscle  
300 tissue repair, such as TGF and IL-10 (48, 49), were not induced after lesion. Further  
301 analysis to evaluate long-term muscle injury and its function after ZIKV infection  
302 should be performed to explore this association.

303 Besides to be a peripheral site of ZIKV amplification, temporal analysis of  
304 muscular and neural ZIKV replication showed that the virus establishes a rapid and  
305 sustained kinetic of amplification in muscle tissue even before the viral replication in  
306 the neural tissues in mice. Furthermore, the inability of ZIKV disturb the BBB  
307 permeability, after early life infection, reinforces the possibility of viral accesses CNS  
308 by peripheral neurons. This is also supported by the detection of ZIKV negative strain  
309 in the DRG of neonates (6 dpi), and corroborates with previous studies that  
310 demonstrated ZIKV replication in explants and neurons from DRG of ZIKV-infected  
311 mice (16, 50). In addition, it was previously demonstrated that ZIKV reaches CNS  
312 without disrupt BBB by transcytosis, interfering on its permeability only at late stages  
313 of infection (15). However, it does not excludes that ZIKV could use peripheral neural  
314 route to access CNS, as already demonstrated to others neurotropic virus (20, 51).

315 Overall, our findings suggest that maintenance of viral load by muscle  
316 replication and inflammation could be an important step in ZIKV pathogenesis. It  
317 highlights the importance of investigating the molecular aspects associated with ZIKV-  
318 muscle interactions in the initial steps of the infection, dissemination and CNS damage  
319 in ZIKV-infected patients. Of note, the control of muscle viral replication could be an  
320 important issue for the development of therapeutic strategies to prevent neurological  
321 complications after ZIKV infection. Taken together our data contribute to a broader  
322 understanding of ZIKV pathogenesis and opens new aspects in the investigation of the  
323 long-term consequence of early infection.

## 324 **Material and Methods**

### 325 *Virus propagation and quantification*

326 Zika virus (ZIKV-BRPE, ref. KX197192), was propagated in C6/36 cell lineage  
327 cultured in L-15 medium (Leboviz's Invitrogen) supplemented with 10% of fetal bovine  
328 serum (FBS), at 28°C. C6/36 cells were infected in a multiplicity of infection (MOI) of  
329 0.01 in L-15 without serum for 1 hour. After adsorption, medium was removed and  
330 infected C6/36 was cultured for 7 days in L-15 supplemented with 5% of serum at 20°C.  
331 After this period, culture medium was collected and centrifuged at 2,000 x g for 10 min  
332 to remove cell debris. The clarified medium was aliquoted and stored at -80°C. The  
333 same procedure was performed in C6/36 uninfected cells, to production of Mock stock.  
334 Viral titer of the stock was determined by plaque assay in VERO cells.

335 VERO cells cultured in D-MEM high glucose (Invitrogen) without serum at 24-  
336 well plates at 37°C and 5% of CO<sub>2</sub> atmosphere were infected with ten-fold serial  
337 dilutions of ZIKV stock for 1 hour. After this period, medium was replaced by the D-  
338 MEM high glucose medium with 1.5% of carboxy-methyl cellulose (CMC-Sigma Co.),

339 1% FBS and 1% penicillin / streptomycin (Invitrogen) and cells cultured for 5 days at  
340 37°C and 5% of CO<sub>2</sub> atmosphere. Cells were fixed with a solution of 10%  
341 Formaldehyde (Vetec, Sigma Co.) for 30 minutes, and then stained with crystal violet  
342 solution (20% Ethanol, 1% Crystal Violet (Sigma Co.) and H<sub>2</sub>O). After wash, viral  
343 stocks title was calculated as plaque forming units per mL (pfu/mL)

#### 344 *Human primary muscle cells culture, differentiation and infection*

345 HSMM cells (Human Skeletal Muscle Myoblasts) are precursor skeletal muscle cells  
346 isolated from the arm or leg of adult healthy donors, were obtained from Lonza cell  
347 facility (catalog number CC-2580). These cells were cultured following Lonza  
348 specification and medium (SkGMTM medium), at 37°C and CO<sub>2</sub> atmosphere. For the  
349 induction of differentiation of myoblast into myotubes, cells were plated with high  
350 density and the SkGM medium was supplemented with 2% horse serum (GIBCO® -  
351 Life Technologies TM). The culture medium was replaced every two days until the  
352 formation of the fibers (about 5-6 days).

353 HSMM myoblast and myotubes were infected with ZIKV using a MOI of  
354 5 in SkGM medium without serum during 1 hour. After infection, HSMM were cultured  
355 in SkGM medium supplemented with 5% of SFB. Culture medium was temporally  
356 collected to determine the amount of ZIKV released during myoblast and myotubes  
357 infection by plaque assay. Myoblast and myotubes viability was determined by 3-(4,5-  
358 Dimethylthiazol-2-yl)-2,5-Diphenyltetrazolium Bromide (MTT; Life Technologies)  
359 metabolization.

360 For the infection during differentiation HSMM was cultured as described above.  
361 After 1 day of differentiation stimuli (Day 1), HSMM were mock or ZIKV infected with

362 MOI of 1 and cultured in SKGM differentiation medium until complete 5 days of  
363 stimuli (Day 5). Culture medium was temporally collected to determine ZIKV load at  
364 medium by plaque assay. Cells were fixed at day 1 and day 5 to immunostaining of  
365 fibers formed and cell viability was determined by MTT assay.

### 366 *Fluorescence microscopy*

367 HSMM cells seeded in 24-well plates were fixed with 4% of formaldehyde in phosphate  
368 balanced salt solution (PBS - pH 7.4) at desired time post-infection. Staining for viral  
369 proteins was performed using conditioned media of 4G2 hybridome (anti-flavivirus  
370 mouse antibody) at 1:10 dilution. HSMM myofibers were stained using a polyclonal  
371 antibody against myosin heavy chain (MF20) at 1:50 dilution. After that, both were  
372 stained with a goat anti-mouse Alexa-fluor 488 (Invitrogen) at 1:500 dilution. Cells in  
373 each field were visualized with nucleus stained with DAPI (GIBCO® - Life  
374 Technologies TM) at 1:10,000 dilution. Images were acquired using an inverted  
375 fluorescence microscope (IX81 – Olympus) with magnification of 20X. Images of 4G2  
376 positive cells of at least 10 fields were used to determine % of infected HSMM. The cell  
377 fusion index in cultured Mock and ZIKV-infected myotubes was determined by  
378 quantification of MF20 positive cells in % of total nucleus (DAPI) and fiber area was  
379 obtained measuring the fluoresce of MF20 stained normalized by cell number. Image  
380 quantification was performed using at least 10 fields using imageJ software (version  
381 1.51 j.8).

### 382 *Mice infection and tissue sample*

383 All experimental procedures performed were in accordance with protocol and standards  
384 established by the National Council for Control of Animal Experimentation (CONCEA,



385 Brazil) and approved by the Institutional Animal Care and Use Committee (CEUA),  
386 from Federal University of Rio de Janeiro (protocol no. 014/16; CEUA-UFRJ, Rio de  
387 Janeiro, Brazil).

388 For mouse model of ZIKV maternal transmission we used 8 week-age type-I  
389 interferon receptor deficient (IFNAR<sup>-/-</sup>) pregnant mice in different gestational stages  
390 (10.5, 12.5 and 14.5). Pregnant mice were subcutaneously inoculated with mock or 10<sup>5</sup>  
391 pfu of ZIKV in a final volume of 50 µL, and monitored until delivery. The pups were  
392 counted; vital signs were observed and photographed at post-natal day 0 (P0). Pups  
393 brain and skeletal muscle from left and right hind legs were collected at P0 and fixed in  
394 4% formaldehyde to histological or stored at -80 °C to viral quantification analysis.

395 For neonatal mice model, three day-old wide-type (WT) SV129 mice were  
396 subcutaneously inoculated with mock or 10<sup>6</sup>pfu of ZIKV in the dorsum in a final  
397 volume of 50 µl. Each experimental group was housed individually with the uninfected  
398 mothering polypropylene cages, maintained at 25 °C with controlled humidity, under a  
399 12 h light/dark cycle with free access to chow and water. Mice were monitored daily  
400 and body weight was measured every 2 days. Tissue samples of Mock- and ZIKV-  
401 injected mice were collected at different time points and stored at -80 °C until processed  
402 to qPCR analysis or fixed in 4% formaldehyde to histological analysis.

#### 403 ***Endothelial barrier integrity analysis***

404 Neonatal mice were subcutaneously inoculated with 50 µL of 1 % Evans blue solution  
405 (VETEC) before (3 days-old, moment of infection) and 2, 4 and 12 days after the  
406 injection of mock or ZIKV. After 1 h, mice were perfused with PBS, and then the brain  
407 and other peripheral tissues (liver, spleen and muscle) were collected to observe Evans  
408 blue staining.

409 *Histology*

410 Skeletal muscle from hind legs of mice were collected bilaterally at 6-days post-  
411 infection, fixed with 4% of formaldehyde and embedded in paraffin after dehydration.  
412 Paraffin-embedded tissue sections of 5  $\mu$ m were prepared and stained with hematoxylin  
413 and eosin (H&E). Images were obtained using optical microscopy with a magnification  
414 of 10 X (Olympus BX40), and images were acquired using software Leica Application  
415 Suite 3.8 (Leica).

416 *Quantification of ZIKV RNA and proteins expression by qPCR*

417 Tissues were homogenized using a fixed concentration (0.2 mg tissue/ $\mu$ l) in DMEM,  
418 and 200  $\mu$ L of the homogenate were used for RNA extraction with Trizol (Invitrogen)  
419 according the manufacturer's instructions. Purity and integrity of RNA were determined  
420 by the 260/280 and 260/230 nm absorbance ratios. One  $\mu$ g of isolated RNA was  
421 submitted to DNase treatment (Ambion, Thermo Fisher Scientific Inc.) and then  
422 reverse-transcribed using the High-Capacity cDNA Reverse Transcription Kit (Thermo  
423 Fisher Scientific Inc).

424 For quantification of ZIKV RNA primers for ZIKV were used as described by  
425 Lanciotti (2008): forward, 5'-CCGCTGCCCAACACAAG-30; reverse, 5'-  
426 CCACTAACGTTCTTTTGCAGACAT-3'; probe, 5'-/56-  
427 FAM/AGCCTACCT/ZEN/TGACAAGCAATCAGACACTCAA/3IABkFQ/-3'  
428 (Integrated DNA Technologies). Analyses were carried out on an Applied Biosystems  
429 7500 RT-PCR system using the TaqMan Mix (ThermoFisher Scientific Inc) according  
430 to manufacturer's instructions. Cycle threshold (Ct) values were used to calculate the  
431 equivalence of  $\log_{10}$  PFU/ $\mu$ g of total RNA after conversion using a standard-curve with  
432 serial 10-fold dilutions of ZIKV stock.

433 To detect negative ZIKV RNA strand in dorsal root ganglion (DRG), RNA was  
434 extracted as described above and cDNA was synthesized using 2 pmol of ZIKV 835  
435 forward primer instead of random primers. Real time quantitative PCR analysis was  
436 performed as described above.

437 Quantification of proteins expression at muscle was performed using the Power  
438 SYBR kit (Applied Biosystems; Foster City, CA). Actin was used as an endogenous  
439 control. Primer sequences were the following: IL-6 (FW- 5'-  
440 TTCTTGGGACTGATGCTGGTG-3'; REV, 5'-CAGAATTGCCATTGCACACTC-3'),  
441 MCP-1 (FW, 5'-GTCCCCAGCTCAAGGAGTAT-3'; REV, 5'-  
442 CCTACTTCTTCTCTGGGTTG-3'), RANTES (FW, 5'-  
443 GTGCCACGTCAAGGAGTAT-3'; REV, 5'-CCTACTTCTTCTCTGGGTTG-3'),  
444 TNF (FW, 5'-CCTCACACTCAGATCATCTTCTCA-3'; REV, 5'-  
445 TGGTTGTCTTTGAGATCCATGC-3'), IL-1 $\beta$  (FW, 5'-  
446 GTAATGAAAGACGGCACACC-3'; REV, 5'-ATTAGAAACAGTCCAGCCCA -3');  
447 Actin (FW, 5'-TGTGACGTTGACATCCGTAAA -3'; REV, 5'-  
448 GTACTTGCGCTCAGGAGGAG-3'). MURF1 (FW, 5'-  
449 GAGAACCTGGAGAAGCAGCTCAT -3'; REV, 5'-CCGCGGTTGGTCCAGTAG-  
450 3'); ATROGIN-1 (FW, 5'-AGAAAAGCGGCACCTTCGT-3'; REV, 5'-  
451 CTTGGCTGCAACATCGTAGTT-3').

452

### 453 *Statistical analyses*

454 Statistical analyses were performed comparing means by two-tailed T-Student's tests  
455 using Graph Pad Prism version 7.00 for Windows, Graph Pad Software, La Jolla  
456 California USA, [www.graphpad.com](http://www.graphpad.com).

## 457 **Acknowledgments**

458 This work was supported by grants from Brazilian funding agencies: Fundação de  
459 Amparo à Pesquisa do Estado do Rio de Janeiro (FAPERJ); Conselho Nacional de  
460 Desenvolvimento Científico e Tecnológico (CNPq), Agência Financiadora de Inovação  
461 e Pesquisa (Finep) and Coordenação de Aperfeiçoamento de Pessoal de Nível Superior  
462 (CAPES), finance Code 001.

463

## 464 **Authors Contributions**

465 IAM, DGL, CMF, JRC, CPF, CFB and LL designed the experiments. DGL, CMF, LGB,  
466 MOLS, SMBA, LDM and RLSN performed the experiments. IAM and DGL analyzed  
467 the results. IAM wrote the manuscript. JRC, CPF, CFB and ATDP reviewed and edited  
468 the manuscript.

## 469 **Declaration of interest statement**

470 The authors declare that the research was conducted in the absence of any conflict of  
471 interest.

## 472 **References**

- 473 1. Musso D, Gubler DJ. Zika Virus. *Clinical microbiology reviews*. 2016;29(3):487-524.
- 474 2. Krauer F, Riesen M, Reveiz L, Oladapo OT, Martinez-Vega R, Porgo TV, et al. Zika Virus Infection  
475 as a Cause of Congenital Brain Abnormalities and Guillain-Barre Syndrome: Systematic Review. *PLoS*  
476 *medicine*. 2017;14(1):e1002203.
- 477 3. Carteaux G, Maquart M, Bedet A, Contou D, Brugieres P, Fourati S, et al. Zika Virus Associated  
478 with Meningoencephalitis. *The New England journal of medicine*. 2016;374(16):1595-6.
- 479 4. Nascimento OJM, da Silva IRF. Guillain-Barre syndrome and Zika virus outbreaks. *Current*  
480 *opinion in neurology*. 2017;30(5):500-7.
- 481 5. Melo AS, Aguiar RS, Amorim MM, Arruda MB, Melo FO, Ribeiro ST, et al. Congenital Zika Virus  
482 Infection: Beyond Neonatal Microcephaly. *JAMA neurology*. 2016;73(12):1407-16.
- 483 6. van der Linden V, Filho EL, Lins OG, van der Linden A, Aragao Mde F, Brainer-Lima AM, et al.  
484 Congenital Zika syndrome with arthrogryposis: retrospective case series study. *Bmj*. 2016;354:i3899.
- 485 7. Garcez PP, Loiola EC, Madeiro da Costa R, Higa LM, Trindade P, Delvecchio R, et al. Zika virus  
486 impairs growth in human neurospheres and brain organoids. *Science*. 2016;352(6287):816-8.

- 487 8. Rosa-Fernandes L, Cugola FR, Russo FB, Kawahara R, de Melo Freire CC, Leite PEC, et al. Zika  
488 Virus Impairs Neurogenesis and Synaptogenesis Pathways in Human Neural Stem Cells and Neurons.  
489 *Frontiers in cellular neuroscience*. 2019;13:64.
- 490 9. Nem de Oliveira Souza I, Frost PS, Franca JV, Nascimento-Viana JB, Neris RLS, Freitas L, et al.  
491 Acute and chronic neurological consequences of early-life Zika virus infection in mice. *Science*  
492 *translational medicine*. 2018;10(444).
- 493 10. Yoon KJ, Song G, Qian X, Pan J, Xu D, Rho HS, et al. Zika-Virus-Encoded NS2A Disrupts  
494 Mammalian Cortical Neurogenesis by Degrading Adherens Junction Proteins. *Cell stem cell*.  
495 2017;21(3):349-58 e6.
- 496 11. Figueiredo CP, Barros-Aragao FGQ, Neris RLS, Frost PS, Soares C, Souza INO, et al. Zika virus  
497 replicates in adult human brain tissue and impairs synapses and memory in mice. *Nature*  
498 *communications*. 2019;10(1):3890.
- 499 12. Li C, Wang Q, Jiang Y, Ye Q, Xu D, Gao F, et al. Disruption of glial cell development by Zika virus  
500 contributes to severe microcephalic newborn mice. *Cell discovery*. 2018;4:43.
- 501 13. Abbott NJ, Patabendige AA, Dolman DE, Yusof SR, Begley DJ. Structure and function of the  
502 blood-brain barrier. *Neurobiology of disease*. 2010;37(1):13-25.
- 503 14. Mustafa YM, Meuren LM, Coelho SVA, de Arruda LB. Pathways Exploited by Flaviviruses to  
504 Counteract the Blood-Brain Barrier and Invade the Central Nervous System. *Frontiers in microbiology*.  
505 2019;10:525.
- 506 15. Papa MP, Meuren LM, Coelho SVA, Lucas CGO, Mustafa YM, Lemos Matassoli F, et al. Zika Virus  
507 Infects, Activates, and Crosses Brain Microvascular Endothelial Cells, without Barrier Disruption.  
508 *Frontiers in microbiology*. 2017;8:2557.
- 509 16. Oh Y, Zhang F, Wang Y, Lee EM, Choi IY, Lim H, et al. Zika virus directly infects peripheral  
510 neurons and induces cell death. *Nature neuroscience*. 2017;20(9):1209-12.
- 511 17. Morrison BM. Neuromuscular Diseases. *Seminars in neurology*. 2016;36(5):409-18.
- 512 18. Ohka S, Matsuda N, Tohyama K, Oda T, Morikawa M, Kuge S, et al. Receptor (CD155)-  
513 dependent endocytosis of poliovirus and retrograde axonal transport of the endosome. *Journal of*  
514 *virology*. 2004;78(13):7186-98.
- 515 19. MacGibeny MA, Koyuncu OO, Wirblich C, Schnell MJ, Enquist LW. Retrograde axonal transport  
516 of rabies virus is unaffected by interferon treatment but blocked by emetine locally in axons. *PLoS*  
517 *pathogens*. 2018;14(7):e1007188.
- 518 20. Samuel MA, Wang H, Siddharthan V, Morrey JD, Diamond MS. Axonal transport mediates West  
519 Nile virus entry into the central nervous system and induces acute flaccid paralysis. *Proceedings of the*  
520 *National Academy of Sciences of the United States of America*. 2007;104(43):17140-5.
- 521 21. Miner JJ, Diamond MS. Zika Virus Pathogenesis and Tissue Tropism. *Cell host & microbe*.  
522 2017;21(2):134-42.
- 523 22. Grounds MD. The need to more precisely define aspects of skeletal muscle regeneration. *The*  
524 *international journal of biochemistry & cell biology*. 2014;56:56-65.
- 525 23. Bodine SC, Baehr LM. Skeletal muscle atrophy and the E3 ubiquitin ligases MuRF1 and  
526 MAFbx/atrogen-1. *American journal of physiology Endocrinology and metabolism*. 2014;307(6):E469-84.
- 527 24. Oliveira Melo AS, Malinger G, Ximenes R, Szejnfeld PO, Alves Sampaio S, Bispo de Filippis AM.  
528 Zika virus intrauterine infection causes fetal brain abnormality and microcephaly: tip of the iceberg?  
529 *Ultrasound in obstetrics & gynecology : the official journal of the International Society of Ultrasound in*  
530 *Obstetrics and Gynecology*. 2016;47(1):6-7.
- 531 25. Wang JN, Ling F. Zika Virus Infection and Microcephaly: Evidence for a Causal Link. *International*  
532 *journal of environmental research and public health*. 2016;13(10).
- 533 26. Ng DHL, Ho HJ, Chow A, Wong J, Kyaw WM, Tan A, et al. Correlation of clinical illness with  
534 viremia in Zika virus disease during an outbreak in Singapore. *BMC infectious diseases*. 2018;18(1):301.
- 535 27. Passos SRL, Borges Dos Santos MA, Cerbino-Neto J, Buonora SN, Souza TML, de Oliveira RVC, et  
536 al. Detection of Zika Virus in April 2013 Patient Samples, Rio de Janeiro, Brazil. *Emerging infectious*  
537 *diseases*. 2017;23(12):2120-1.
- 538 28. Chal J, Pourquie O. Making muscle: skeletal myogenesis in vivo and in vitro. *Development*.  
539 2017;144(12):2104-22.
- 540 29. Warke RV, Becerra A, Zawadzka A, Schmidt DJ, Martin KJ, Giaya K, et al. Efficient dengue virus  
541 (DENV) infection of human muscle satellite cells upregulates type I interferon response genes and  
542 differentially modulates MHC I expression on bystander and DENV-infected cells. *The Journal of general*  
543 *virology*. 2008;89(Pt 7):1605-15.

- 544 30. Lohachanakul J, Phuklia W, Thannagith M, Thongsakulprasert T, Smith DR, Ubol S. Differences in  
545 response of primary human myoblasts to infection with recent epidemic strains of Chikungunya virus  
546 isolated from patients with and without myalgia. *Journal of medical virology*. 2015;87(5):733-9.
- 547 31. Rohatgi A, Corbo JC, Monte K, Higgs S, Vanlandingham DL, Kardon G, et al. Infection of  
548 myofibers contributes to increased pathogenicity during infection with an epidemic strain of  
549 chikungunya virus. *Journal of virology*. 2014;88(5):2414-25.
- 550 32. Azeredo EL, Dos Santos FB, Barbosa LS, Souza TMA, Badolato-Correa J, Sanchez-Arcila JC, et al.  
551 Clinical and Laboratory Profile of Zika and Dengue Infected Patients: Lessons Learned From the Co-  
552 circulation of Dengue, Zika and Chikungunya in Brazil. *PLoS currents*. 2018;10.
- 553 33. Duca LM, Beckham JD, Tyler KL, Pastula DM. Zika Virus Disease and Associated Neurologic  
554 Complications. *Current infectious disease reports*. 2017;19(1):4.
- 555 34. Vieira M, Costa CHN, Linhares ADC, Borba AS, Henriques DF, Silva E, et al. Potential role of  
556 dengue virus, chikungunya virus and Zika virus in neurological diseases. *Memorias do Instituto Oswaldo*  
557 *Cruz*. 2018;113(11):e170538.
- 558 35. Hamel R, Dejarnac O, Wichit S, Ekchariyawat P, Neyret A, Luplertlop N, et al. Biology of Zika  
559 Virus Infection in Human Skin Cells. *Journal of virology*. 2015;89(17):8880-96.
- 560 36. Kim JA, Seong RK, Son SW, Shin OS. Insights into ZIKV-Mediated Innate Immune Responses in  
561 Human Dermal Fibroblasts and Epidermal Keratinocytes. *The Journal of investigative dermatology*.  
562 2019;139(2):391-9.
- 563 37. Paniz-Mondolfi AE, Blohm GM, Hernandez-Perez M, Larrazabal A, Moya D, Marquez M, et al.  
564 Cutaneous features of Zika virus infection: a clinicopathological overview. *Clinical and experimental*  
565 *dermatology*. 2019;44(1):13-9.
- 566 38. Dudley DM, Newman CM, Lalli J, Stewart LM, Koenig MR, Weiler AM, et al. Infection via  
567 mosquito bite alters Zika virus tissue tropism and replication kinetics in rhesus macaques. *Nature*  
568 *communications*. 2017;8(1):2096.
- 569 39. Tricot T, Helsen N, Kaptein SJF, Neyts J, Verfaillie CM. Human stem cell-derived hepatocyte-like  
570 cells support Zika virus replication and provide a relevant model to assess the efficacy of potential  
571 antivirals. *PloS one*. 2018;13(12):e0209097.
- 572 40. Christ B, Brand-Saber B. Limb muscle development. *The International journal of developmental*  
573 *biology*. 2002;46(7):905-14.
- 574 41. Davis TA, Fiorotto ML. Regulation of muscle growth in neonates. *Current opinion in clinical*  
575 *nutrition and metabolic care*. 2009;12(1):78-85.
- 576 42. Gokhin DS, Ward SR, Bremner SN, Lieber RL. Quantitative analysis of neonatal skeletal muscle  
577 functional improvement in the mouse. *The Journal of experimental biology*. 2008;211(Pt 6):837-43.
- 578 43. Tang H, Hammack C, Ogden SC, Wen Z, Qian X, Li Y, et al. Zika Virus Infects Human Cortical  
579 Neural Progenitors and Attenuates Their Growth. *Cell stem cell*. 2016;18(5):587-90.
- 580 44. Souza BS, Sampaio GL, Pereira CS, Campos GS, Sardi SJ, Freitas LA, et al. Zika virus infection  
581 induces mitosis abnormalities and apoptotic cell death of human neural progenitor cells. *Scientific*  
582 *reports*. 2016;6:39775.
- 583 45. Chimelli L, Melo ASO, Avvad-Portari E, Wiley CA, Camacho AHS, Lopes VS, et al. The spectrum of  
584 neuropathological changes associated with congenital Zika virus infection. *Acta neuropathologica*.  
585 2017;133(6):983-99.
- 586 46. O'Connor RS, Pavlath GK. Point:Counterpoint: Satellite cell addition is/is not obligatory for  
587 skeletal muscle hypertrophy. *Journal of applied physiology*. 2007;103(3):1099-100.
- 588 47. Londhe P, Guttridge DC. Inflammation induced loss of skeletal muscle. *Bone*. 2015;80:131-42.
- 589 48. Delaney K, Kasprzycka P, Ciemerych MA, Zimowska M. The role of TGF-beta1 during skeletal  
590 muscle regeneration. *Cell biology international*. 2017;41(7):706-15.
- 591 49. Deng B, Wehling-Henricks M, Villalta SA, Wang Y, Tidball JG. IL-10 triggers changes in  
592 macrophage phenotype that promote muscle growth and regeneration. *Journal of immunology*.  
593 2012;189(7):3669-80.
- 594 50. Swartwout BK, Zlotnick MG, Saver AE, McKenna CM, Bertke AS. Zika Virus Persistently and  
595 Productively Infects Primary Adult Sensory Neurons In Vitro. *Pathogens*. 2017;6(4).
- 596 51. Dietzschold B, Schnell M, Koprowski H. Pathogenesis of rabies. *Current topics in microbiology*  
597 *and immunology*. 2005;292:45-56.

599 **Figure Captions**

600 **Figure 1. ZIKV replicates and promotes death of human skeletal muscle**  
601 **progenitor cells.** Human primary skeletal myoblast and differentiated myotubes culture  
602 were infected with ZIKV with a MOI of 5 and temporally assessed. (A) ZIKV released  
603 at cultures supernatant at different times post-infection was quantified by plaque assay  
604 (n=3-5 each point); (B-G) Immunofluorescence analysis for detection of ZIKV positive  
605 myoblast (B and D) and myotubes (C and E) 36 hours post-infection using anti-  
606 flavivirus E protein 4G2 and anti-NS2b of ZIKV. White arrows indicate some positive  
607 cells; (F-G) detection of fibers at Mock (F) and ZIKV (G) infected myotube culture  
608 using anti-myosin heavy chain (MF20) 48 hours post infection; (H) Quantitative  
609 analysis of 4G2 positive cells in % of total (Nuclear staining with DAPI) was performed  
610 using at least 10 fields of 2 independent experiments using ImageJ software; (I)  
611 myoblast (white bars) and myotubes (black bars) viability was determined by MTT  
612 reduction 48 hours post ZIKV infection related to Mock of 3 independent experiments  
613 in triplicate; (J-k) Quantification of MF20 positive was used to determine cells fusion  
614 index (J) and fiber area (k) related to total of cells (nuclear staining with DAPI) at  
615 differentiated culture 48 hours post ZIKV infection and mock using at least 10 fields of  
616 2 independent experiments using ImageJ software. Data was analyzed using ANOVA  
617 (A and H) and Mann-Whitney non-parametric tests (I). \*p<0.05

618 **Figure 2. ZIKV infection inhibits myogenesis.** Skeletal muscle progenitor cells were  
619 subjected to differentiation into myotubes. At day 1 of differentiation were Mock or  
620 ZIKV infected with MOI of 1, then was cultured until day 5 of differentiation. (A) Cells  
621 were fixed at day 1 and 5 of differentiation and formed fibers were detected by  
622 immunofluorescence using MF20 (red) and cell nucleus was stained with DAPI (blue).  
623 (B) Fiber area and (C) fusion index (%) of mock (black bars) and ZIKV infected cell

624 (white bars) were obtained by fluorescence images analysis of at least 10 fields of tree  
625 independent experiments using ImagJ software. **(D)** ZIKV released at culture  
626 supernatant at different times post-infection was quantified by plaque assay (n=3, each  
627 point). **(E)** Cell Viability was determined by MTT metabolization 96 h post ZIKV  
628 infection with MOI of 0.5 and 1; values are expressed as a % of mock group (control).  
629 Statistical analysis was performed by two-way ANOVA. \*\*\*\*p<0.0001

630 **Figure 3. ZIKV replicates at mice muscle after maternal transmission and**  
631 **neonatal infection.** **(A)** Schematically representation of the period of ZIKV infection  
632 at pregnant SVA129 mice (**model 1 – red arrow**) and pups of SV129 mice (**model 2 –**  
633 **blue arrow**). **Model 1** - SVA129 female was Mock or ZIKV infected ( $10^5$  pfu) at  
634 different pregnancy period (12.5, 14.5, and 18.5, n=3 each) and pups were analyzed at  
635 birth; **(B)** Number of pup per litter after infection at 12.5 of pregnancy; **(C and D)**  
636 Muscle and brain were collected at birth after ZIKV inoculation at different pregnancy  
637 period of infection (**PPI**). ZIKV RNA at tissue was quantified by qPCR in samples of 3  
638 independent experiments. **Model 2** – 3 days-old WT SV129 mice was mock or ZIKV  
639 infected ( $10^6$  pfu) and temporally accompanied. **(E)** Weight gain after infection (n=8);  
640 **(F)** muscle, liver and spleen tissues were collected to quantification of ZIKV RNA load  
641 by qPCR at different times post infection (n=4-6, each point). N: indicates non-  
642 detectable. Statistical analysis was performed by **(I)** unpaired t test and **(E and F)** two-  
643 way ANOVA followed of Tukey's multiple comparisons test. \*p<0.05, \*\*p<0.01 and  
644 \*\*\*p<0.001.

645 **Figure 4. ZIKV induces muscle inflammation and damage in pups and neonate**  
646 **infection.** SVA129 mice at 12.5 of gestation and 3 days-old WT SV129 mice were  
647 Mock or ZIKV infected. Skeletal muscle from hind legs of pups and of neonate were  
648 collected bilaterally and fixed at birth or 6 days post-infection, respectively, for



649 histological analysis (**A-F**). Muscle tissues were embedded in paraffin after dehydration  
650 and tissue sections of 5  $\mu\text{m}$  were prepared and stained with H&E. Scale bar = 100  $\mu\text{m}$ .  
651 Black arrows areas of inflammation; red arrows indicate atrophy areas; dashed lines  
652 indicated areas of intense lesion. (**G-N**) Skeletal muscle from hind legs of neonates was  
653 collected at 6 days post-infection and the levels of TNF- $\alpha$ , IL-6, MCP-1, IL-1 $\beta$ ,  
654 RANTES, MURF and Atrogin expression were determined related to Mock group by  
655 qPCR using  $\beta$ -actin expression as endogenous control. Values were plotted as mean  $\pm$   
656 Standard Error of Mean (SEM). Statistical analysis was performed using two-sided  
657 Mann-Whitney test. P \* $\leq$ 0.05, \*\* $\leq$ 0.01.

658 **Figure 5. ZIKV replicates in muscle prior to reach neural tissue in mice.** (**A**) 3  
659 days-old WT SV129 mice were ZIKV infected and the ZIKV replication kinetic at  
660 muscle, brain, spinal cord (SC) and dorsal root ganglia (DRG) was determined by  
661 qPCR. (**B**) Negative strain amplification was detected by qPCR in neural structures 6  
662 days post-infection and CT values (cycle threshold) were plotted. (**C**) ZIKV load was  
663 detected at late times post-infection in muscle and brain. ZIKV RNA load in **A** and **C**  
664 were plotted as mean  $\pm$  standard error (SEM) of ZIKV equivalent of PFU/ $\mu\text{g}$  of total  
665 RNA.

666

### 667 **Supporting Information**

668

669 **Supplementary figure 1.** Immunofluorescence staining of ZIKV proteins in mock  
670 myoblast (**A**) and myotubes (**B**) 36 hours post-infection using anti-flavivirus E protein  
671 4G2 and anti-NS2b of ZIKV.

672 **Supplementary figure 2. ZIKV infection during middle gestational stage in mice**

673 **result fetal death.** Females of IFNAR<sup>-/-</sup> mice were inoculated with ZIKV or mock on  
674 12.5<sup>th</sup> gestational day. **(A)** Representative images of litter at born from Mock and  
675 infected female. **(B)** Image of placenta of ZIKV infected female and for viral load at this  
676 samples were quantified by qPCR. **(C)** Survival curve of mock or ZIKV infected WT 3  
677 days-old mice. The survival curve represents two experiments with 7 animals each.

678 **Supplementary figure 3.** Skeletal muscle from hind legs of neonates was collected at 6

679 days post-infection and the levels of TGF- $\beta$  **(A)** and IL-10 mRNA **(B)** were determined  
680 related to Mock group by qPCR using  $\beta$ -actin expression as endogenous control. Values  
681 are showed as mean  $\pm$  Standard Error of Mean (SEM). Statistical analysis was  
682 performed using two-sided Mann-Whitney test. **Blood-brain barrier permeability** were  
683 analyzed in 3 days-old WT mice before infection **(B)**, and at different times after Mock  
684 or ZIKV infection **(D-E)** was investigated with subcutaneously inoculation of 1% Evans  
685 blue solution **(EB)** or PBS. After a period of 1h animals were perfused with PBS, brains  
686 and peripheral tissues (spleen, liver and muscle) were removed for visualization.

687

688

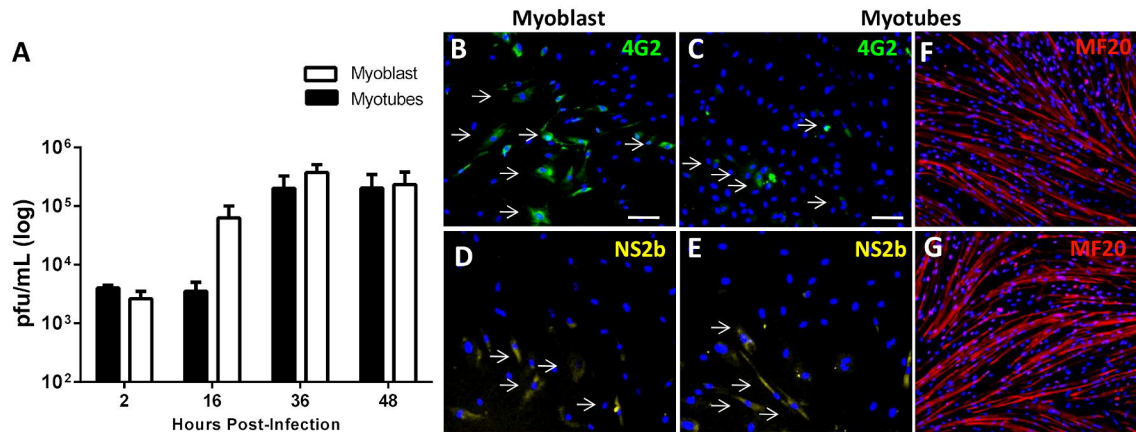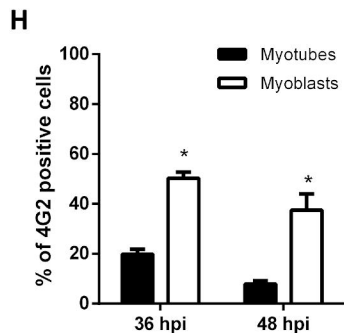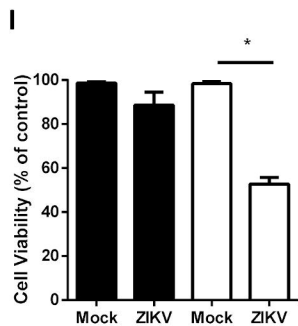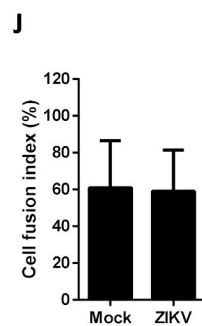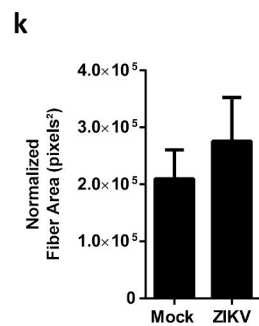

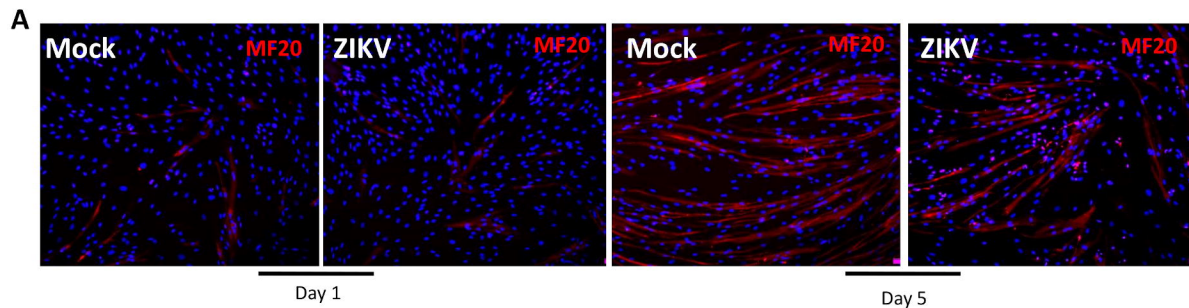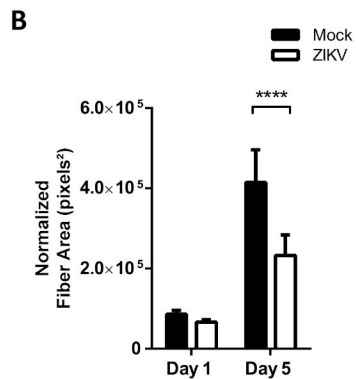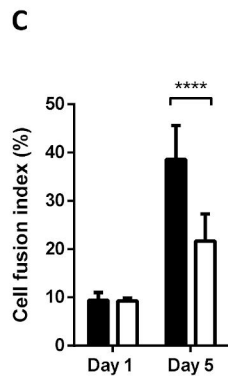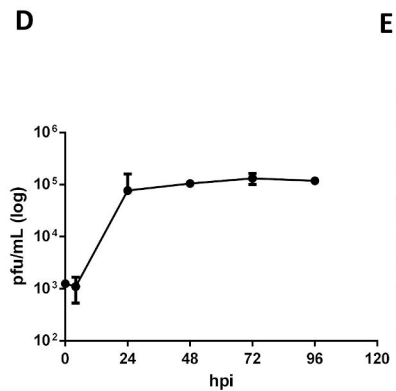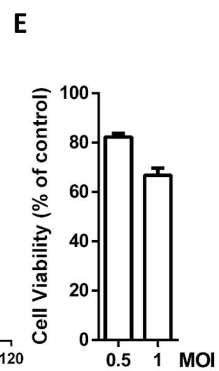

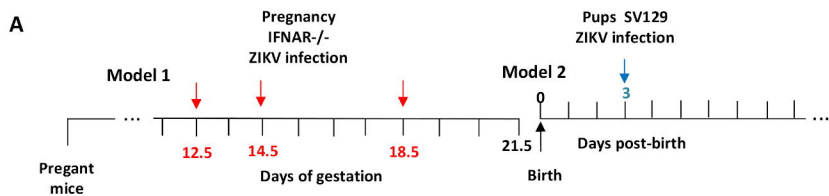

**B** ZIKV infection at 12.5

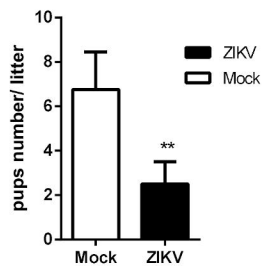

**C**

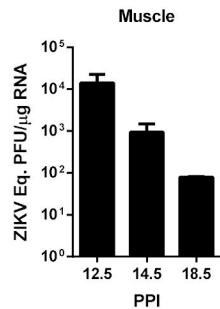

**D**

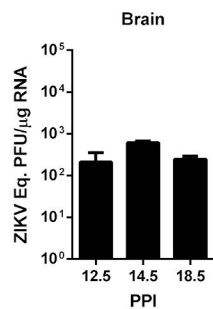

**E**

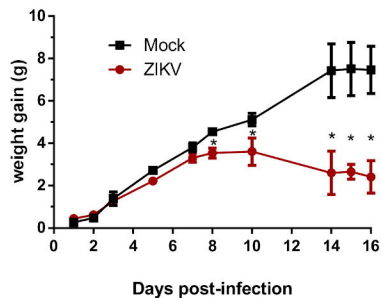

**F**

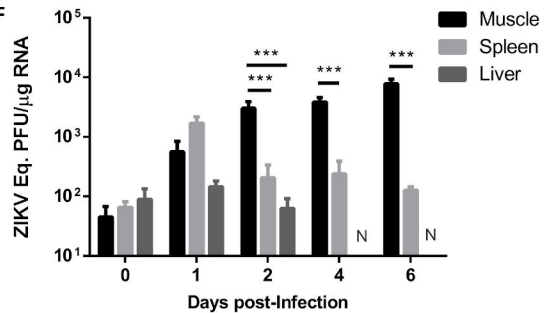

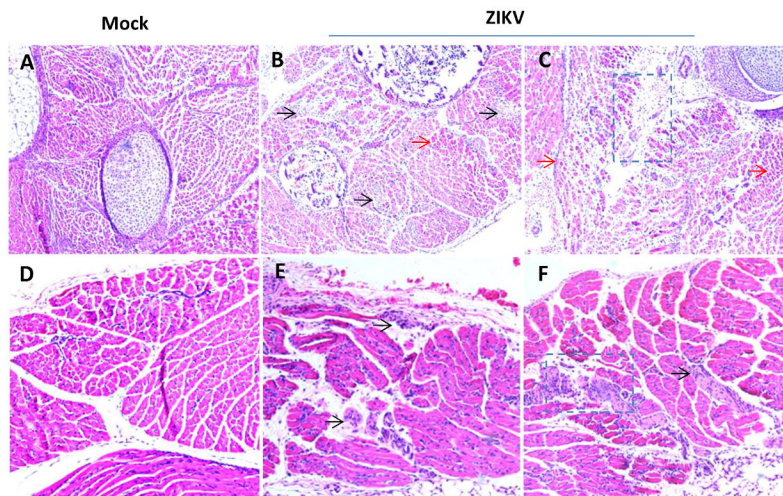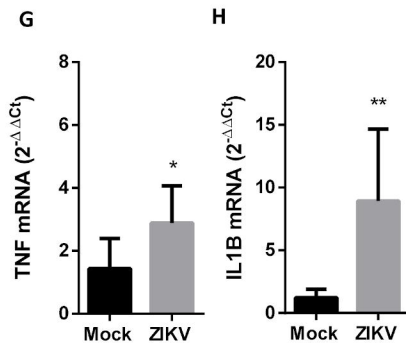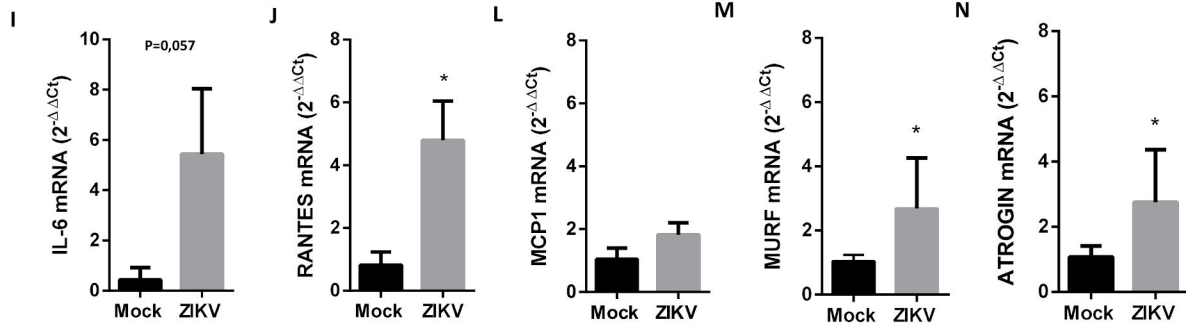

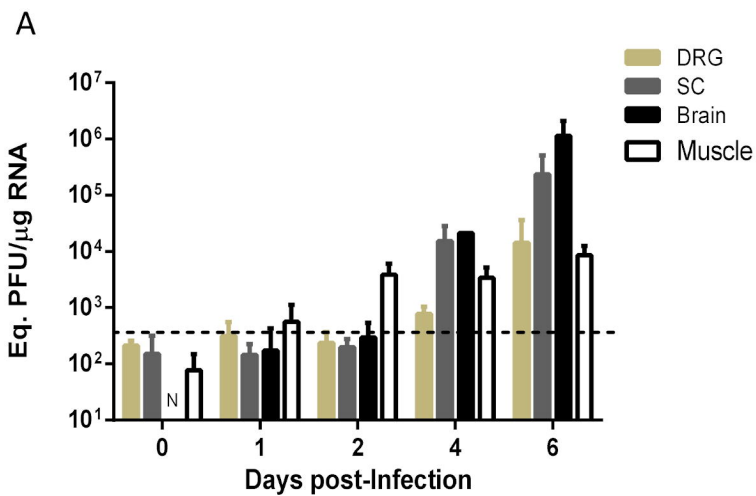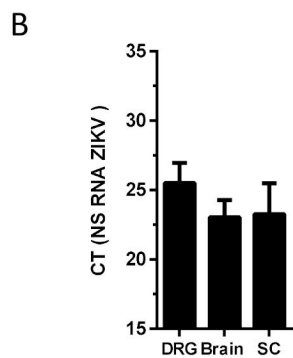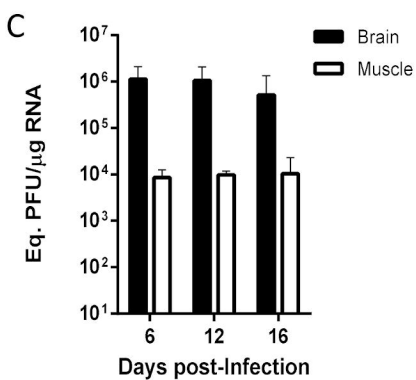

**A**

**Myoblast**

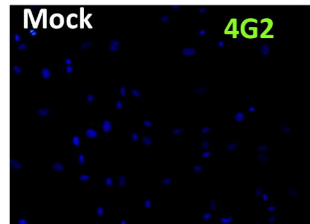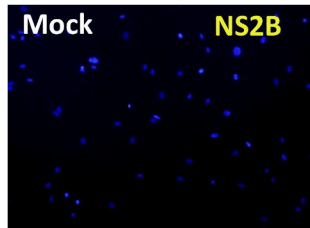

**B**

**Myotubes**

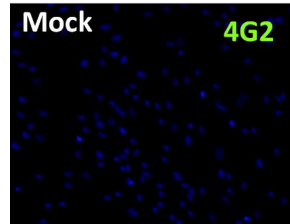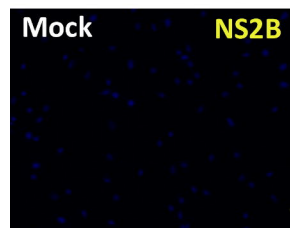



**A**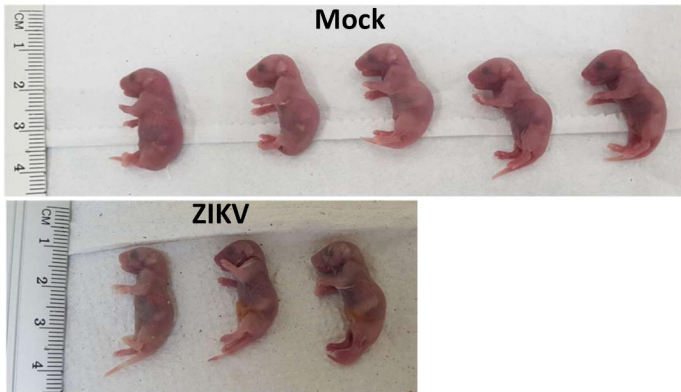**B**

Fetal fragments in the placenta

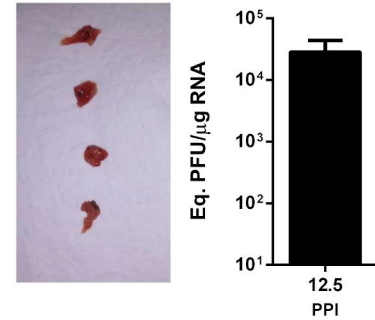**C** Survival of neonate after infection (WT 3-day-old mice)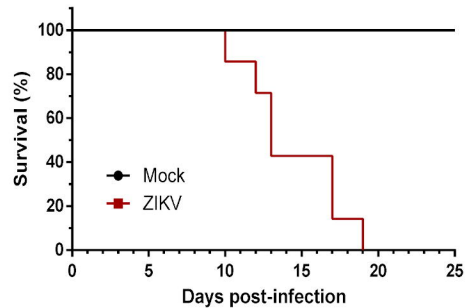

**A**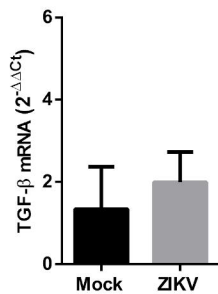**B**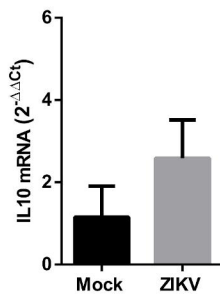**C**

WT 3 day-old mice

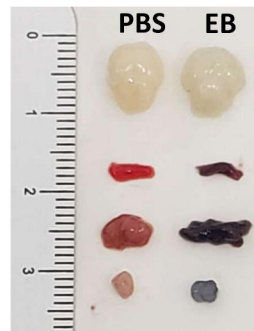**D**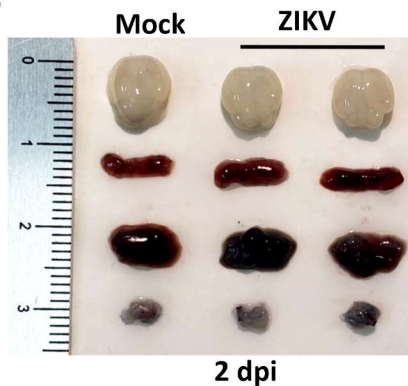**E**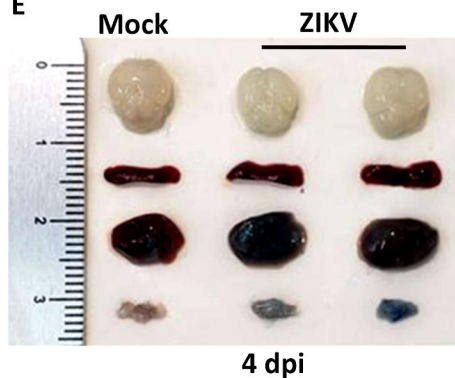

Source: http://biorxiv.org/content/10.1101/2020.03.26.010389v1.full.pdf
